# Supplementary material for: Attitudes toward the SARS-CoV-2 and Influenza Vaccination in the Metropolitan Cities of Bologna and Palermo, Italy
Source: MDPI journal article supplement (doi:10.3390/vaccines9101200), 2021-10-18
Supplement: s1 [file s1]

# Supplementary Materials

## Survey Instrument

### Personal information

- City
- Age
- Gender
- Educational level

### COVID-19 vaccination

- **Are you willing to receive COVID-19 vaccination?**
- **If Yes, which determinants are mainly associated with your decision?**
  - I have read information (internet/media/social media) that makes me trust the vaccine
  - I follow people or groups (political/religious/influencers) that make me trust the vaccine
  - I have trust in the safety of vaccines
  - I trust the government with deciding which vaccines are mandatory
  - In the past I have never had any problems in accessing vaccinations
  - I do not believe the vaccine is a tool for the enrichment of lobbies/pharmaceutical companies
  - I have not had any unpleasant personal experiences with previous vaccinations
  - The vaccine is an effective tool for me/my family/my community
  - I would trust a newly developed vaccine
  - I trust doctors and health personnel
  - I am not afraid of the pain nor the mode of administration
  - I believe that the risk of contracting COVID-19 is much greater than the risks of vaccination
  - People I know tend to be confident about the vaccine being released
- **If No, which determinants are mainly associated with your decision?**
  - I have read information (internet/media/social media) that makes me doubt the vaccine
  - I follow people or groups (political/religious/influencers) that make me doubt the vaccine
  - I know cases of people damaged by vaccines
  - I don't want politics to force me to take the vaccine
  - In the past I have had problems accessing vaccinations
  - The vaccine is a tool for the enrichment of lobbies/pharmaceutical companies
  - I have had some unpleasant personal experiences with previous vaccinations
  - The vaccine is not an effective tool for me/my family/my community
  - I wouldn't trust a newly developed vaccine
  - I don't trust doctors and health personnel
  - I am afraid of the pain or the mode of administration
  - I think COVID-19 is not threatening enough for me to risk vaccine injuries
  - The people I know tend to be unconfident about the vaccine being released

### Influenza vaccination

- Are you inclined or have you already been vaccinated against influenza during the 2020/2021 season?
- Is or was your choice to vaccinate against influenza affected by the SARS-CoV-2 pandemic?

**Table S1.** Willingness to receive COVID-19 vaccination in Bologna (n=226) and Palermo (n=217).

| Question                                                                                | Answer                                                                                        | Bologna<br>N(%) | Palermo<br>N(%) | Total<br>N(%) |
|-----------------------------------------------------------------------------------------|-----------------------------------------------------------------------------------------------|-----------------|-----------------|---------------|
| <b>Are you willing to receive COVID-19 vaccination?</b>                                 | No                                                                                            | 63 (27.9)       | 45 (20.7)       | 108 (24.4)    |
|                                                                                         | Yes                                                                                           | 163 (72.1)      | 172 (79.3)      | 335 (75.6)    |
| <b>If Yes, which determinants are mainly associated with your decision?<sup>a</sup></b> | I have read information (internet/media/social media) that makes me trust the vaccine         | 46 (28.2)       | 40 (23.3)       | 86 (25.7)     |
|                                                                                         | I follow people or groups (political/religious/influencers) that make me trust the vaccine    | 10 (6.1)        | 7 (4.1)         | 17 (5.1)      |
|                                                                                         | I have trust in the safety of vaccines                                                        | 103 (63.2)      | 68 (39.5)       | 171 (51.0)    |
|                                                                                         | I trust the government with deciding which vaccines are mandatory                             | 17 (10.4)       | 58 (33.7)       | 75 (22.4)     |
|                                                                                         | In the past I have never had any problems in accessing vaccinations                           | 54 (33.1)       | 61 (35.5)       | 115 (34.3)    |
|                                                                                         | I do not believe the vaccine is a tool for the enrichment of lobbies/pharmaceutical companies | 27 (16.6)       | 27 (15.7)       | 54 (16.1)     |
|                                                                                         | I have not had any unpleasant personal experiences with previous vaccinations                 | 57 (35.0)       | 103 (59.9)      | 160 (47.8)    |
|                                                                                         | The vaccine is an effective tool for me/my family/my community                                | 73 (44.8)       | 116 (67.4)      | 189 (56.4)    |
|                                                                                         | I would trust a newly developed vaccine                                                       | 15 (9.2)        | 28 (16.3)       | 43 (12.8)     |
|                                                                                         | I trust doctors and health personnel                                                          | 55 (33.7)       | 78 (45.3)       | 133 (39.7)    |
|                                                                                         | I am not afraid of the pain nor the mode of administration                                    | 28 (17.2)       | 47 (27.3)       | 75 (22.4)     |
|                                                                                         | I believe that the risk of contracting COVID-19 is much greater than the risks of vaccination | 54 (33.1)       | 84 (48.8)       | 138 (41.2)    |
|                                                                                         | People I know tend to be confident about the vaccine being released                           | 19 (11.7)       | 28 (16.3)       | 47 (14.0)     |
| <b>If No, which determinants are mainly associated with your decision?<sup>a</sup></b>  | I have read information (internet/media/social media) that makes me doubt the vaccine         | 26 (41.3)       | 12 (26.7)       | 38 (35.2)     |
|                                                                                         | I follow people or groups (political/religious/influencers) that make me doubt the vaccine    | 7 (11.1)        | 2 (4.4)         | 9 (8.3)       |
|                                                                                         | I know cases of people damaged by vaccines                                                    | 10 (15.9)       | 11 (24.4)       | 21 (19.4)     |
|                                                                                         | I don't want politics to force me to take the vaccine                                         | 16 (25.4)       | 6 (13.2)        | 22 (20.4)     |
|                                                                                         | In the past I have had problems accessing vaccinations                                        | 1 (1.6)         | 0 (0.0)         | 1 (0.9)       |
|                                                                                         | The vaccine is a tool for the enrichment of lobbies/pharmaceutical companies                  | 3 (4.8)         | 1 (2.2)         | 4 (3.7)       |
|                                                                                         | I have had some unpleasant personal experiences with previous vaccinations                    | 3 (4.8)         | 1 (2.2)         | 4 (3.7)       |
|                                                                                         | The vaccine is not an effective tool for me/my family/my community                            | 5 (7.9)         | 5 (11.1)        | 10 (9.0)      |
|                                                                                         | I wouldn't trust a newly developed vaccine                                                    | 37 (58.7)       | 25 (55.5)       | 62 (57.4)     |
|                                                                                         | I don't trust doctors and health personnel                                                    | 2 (3.2)         | 1 (2.2)         | 3 (2.8)       |
|                                                                                         | I am afraid of the pain or the mode of administration                                         | 1 (1.6)         | 2 (4.4)         | 3 (2.8)       |
|                                                                                         | I think COVID-19 is not threatening enough for me to risk vaccine injuries                    | 9 (14.3)        | 0 (0.0)         | 9 (8.3)       |
|                                                                                         | The people I know tend to be unconfident about the vaccine being released                     | 1 (1.6)         | 5 (11.1)        | 6 (5.6)       |
